# Supplementary material for: Optimization of Potential Nanoemulgels for Boosting Transdermal Glimepiride Delivery and Upgrading Its Anti-Diabetic Activity
Source: MDPI journal article supplement (doi:10.3390/gels9060494), 2023-06-18
Supplement: s1 [file s1]

# Optimization of Potential Nanoemulgels for Boosting Transdermal Glimepiride Delivery and Upgrading Its Anti-Diabetic Activity

Marwa H. Abdallah <sup>1,2,\*</sup>, Amr S. Abu Lila <sup>1,2,\*</sup>, Hanan M. El-Nahas <sup>2</sup> and Tarek M. Ibrahim <sup>2</sup>

<sup>1</sup> Department of Pharmaceutics, College of Pharmacy, University of Ha'il, Hail 81442, Saudi Arabia

<sup>2</sup> Department of Pharmaceutics, Faculty of Pharmacy, Zagazig University, Zagazig 44519, Egypt; hananelnahas@gmail.com (H.M.E.-N.); tarekmetwally333@gmail.com (T.M.I.)

\* Correspondence: mh.abdallah@uoh.edu.sa (M.H.A.); a.abulila@uoh.edu.sa (A.S.A.L.)

**Table S1.** Solubility of glimepiride in various nanoemulsion components.

| Oils                | Solubility (mg/g) |
|---------------------|-------------------|
| Peppermint oil      | 3.67 ± 0.13       |
| Bergamot oil        | 2.75 ± 0.91       |
| Mandarin oil        | 2.22 ± 0.19       |
| Tea tree oil        | 2.11 ± 0.24       |
| Eucalyptus oil      | 2.02 ± 0.17       |
| Fennel oil          | 1.92 ± 0.26       |
| Lavandar oil        | 1.40 ± 0.11       |
| Rosemary oil        | 0.82 ± 0.10       |
| Orange oil          | 0.50 ± 0.24       |
| Lemon oil           | 0.43 ± 0.09       |
| Surfactants         | Solubility (mg/g) |
| Tween 80            | 2.94 ± 0.09       |
| Tween 20            | 1.66 ± 0.21       |
| Span 20             | 0.92 ± 0.19       |
| Span 85             | 0.50 ± 0.13       |
| Labrafil isostearyl | 0.61 ± 0.08       |
| Labrafil 1944 CS    | 0.12 ± 0.03       |
| Co-surfactant       | Solubility (mg/g) |
| Transcutol P        | 2.54 ± 0.20       |
| PEG 400             | 1.15 ± 0.14       |
| PG                  | 0.84 ± 0.29       |
| Ethanol             | 0.81 ± 0.05       |
| Lauroglycol FCC     | 0.32 ± 0.10       |
| Glycerin            | 0.11 ± 0.05       |

**Table S2.** Miscibility of various surfactants and co-surfactants in oil phase.

| Gel base type       | Gel:NE ratio | Gel strength (sec) |
|---------------------|--------------|--------------------|
| Carbopol 940 (1%)   | 1.5:1        | 14.01 ± 0.23       |
|                     | 2.5:1        | 28.13 ± 0.84       |
| Carbopol 940 (1.5%) | 1.25:1       | 11.38 ± 0.88       |
|                     | 1.5:1        | 26.30 ± 1.02       |
| Carbopol 940 (2%)   | 0.5:1        | 17.47 ± 0.10       |
|                     | 1:1          | 26.25 ± 0.91       |

|                      |        |              |
|----------------------|--------|--------------|
| Carbopol 934 (1%)    | 2:1    | 8.54 ± 1.12  |
|                      | 3:1    | 17.95 ± 0.41 |
|                      | 3.5:1  | 25.26 ± 0.86 |
| Carbopol 934 (1.5%)  | 1:1    | 10.28 ± 0.35 |
|                      | 2:1    | 18.84 ± 1.40 |
|                      | 3:1    | 31.35 ± 0.74 |
| Carbopol 934 (2%)    | 1:1    | 15.82 ± 1.21 |
|                      | 1.25:1 | 29.30 ± 0.30 |
|                      | 3:1    | 12.89 ± 0.91 |
| Na-CMC (5%)          | 3.25:1 | 21.34 ± 0.75 |
|                      | 3.5:1  | 31.85 ± 0.29 |
|                      | 1:1    | 13.39 ± 0.35 |
| Sodium alginate (5%) | 1.25:1 | 31.24 ± 0.42 |
|                      | 2:1    | 10.02 ± 0.96 |
| HPMC (5%)            | 3:1    | 19.29 ± 1.11 |
|                      | 5:1    | 27.35 ± 0.82 |

**Table S3.** Preliminary study for measuring gel strength values of different GM-loaded nanoemulgel formulations using different gel bases.

| Oil/Surfactant                    | Number of additions (5 µL) |
|-----------------------------------|----------------------------|
| Peppermint oil + (tween 80/water) | 7 additions of oil         |
| Peppermint oil + (tween 20/water) | 6 additions of oil         |
| Bergamot oil + (tween 80/water)   | 55 additions of oil        |
| Bergamot oil + (tween 20/water)   | 50 additions of oil        |
